# Supplementary material for: Efficient differentiation of human primordial germ cells through geometric control reveals a key role for Nodal signaling
Source: eLife. 2022 Apr 8;11:e72811. doi: 10.7554/eLife.72811 (PMC9106331; doi:10.7554/eLife.72811)
Supplement: Supplementary file 1. [file elife-72811-supp1.xlsx]

## Sheet: Sheet1
	0	1	2	3	4	5	6	7
0	ACVR1	ACVR1B	ACVR1C	ACVR2A	ACVR2B	ARAF	BMP2	BMP4
1	BMP7	BMPR1A	BMPR2	BRAF	CDH1	CDH2	CDX2	CER1
2	COL1A1	COL6A2	CXCR4	DKK1	DKK3	DKK4	DLX5	DPPA4
3	DUSP1	DUSP10	DUSP14	DUSP2	DUSP26	DUSP3	DUSP4	DUSP5
4	DUSP6	DUSP7	DUSP8	DUSP9	DVL1	DVL2	DVL3	EGF
5	EGFR	EOMES	EPCAM	EPHA4	ESRG	ETS1	EXT1	EXT2
6	FGF17	FGF2	FGF4	FGF8	FGFR1	FGFR2	FGFR3	FGFR4
7	FGFRL1	FOXA2	FZD1	FZD2	FZD3	FZD4	FZD5	FZD6
8	FZD7	FZD8	FZD9	GABRP	GATA2	GATA3	GATA4	GATA6
9	GLG1	GPC1	GPC2	GPC3	GPC4	GPC6	GSC	HAND1
10	HEY1	HHEX	HOXA13	HOXB2	HOXB6	HOXB7	HOXB9	HOXD1
11	HOXD11	HPSE	HS2ST1	HS3ST1	HS3ST3A1	HS3ST3B1	HS3ST4	HS3ST5
12	HS6ST1	HS6ST2	HS6ST3	HSPG2	HTRA1	IL17RD	ISL1	KIT
13	KLF4	KRT18	KRT7	LAMA4	LEFTY1	LEFTY2	LHX1	LYPD1
14	MAP2K1	MAP2K2	MAPK1	MAPK3	MESP1	MIXL1	MSGN1	NANOG
15	NANOS3	NDST1	NDST2	NDST3	NES	NKX2-5	NODAL	NOG
16	OTX2	PDGFRA	PEBP1	PGF	PODXL	POSTN	POU5F1	PRDM1
17	RAF1	RSPO3	RSPO4	RUNX1	SDC1	SDC2	SDC3	SDC4
18	SMAD1	SMAD2	SMAD3	SMAD4	SMAD5	SMAD6	SMAD7	SMAD9
19	SNAI1	SNAI2	SOX17	SOX2	SOX3	SPRY1	SPRY2	SPRY3
20	SPRY4	SULF1	SULF2	TBX3	TBX6	TBXT	TDGF1	TFAP2A
21	TFAP2C	TGFBR1	TGFBR2	TGFBR3	TGFBR3L	TGFBRAP1	TNNT2	TP63
22	UGDH	VIM	WNT2B	WNT3	WNT3A	WNT4	WNT5A	WNT5B
23	WNT6	WNT8A	WNT9B	ZIC3
