# Supplementary material for: Efficient differentiation of human primordial germ cells through geometric control reveals a key role for Nodal signaling
Source: eLife. 2022 Apr 8;11:e72811. doi: 10.7554/eLife.72811 (PMC9106331; doi:10.7554/eLife.72811)
Supplement: Supplementary file 2. [file elife-72811-supp2.xlsx]

## Sheet: Sheet1
	iMeLC	pluri	AMLC	PS	PGC	ExMe
0	MIXL1	SOX2	ISL1	GATA6	SOX17	SERPINE1
1	SERPINE2	TERF1	CLDN10	MESP1	PRDM1	NPPB
2	GAL	ESRG	AMER2	CER1	NANOS3	ANXA1
3	MEIS3	LNCPRESS1	SGK1	FGF17	CRHBP	SPP1
4	CNTNAP2	USP44	KRT19	GATA6-AS1	TFAP2C	MYL7
5	EOMES	POLR3G	HPGD	DKK1	AC007326.5	TAGLN
6	CYP1B1	FOXD3-AS1	HAPLN1	MIXL1	LBH	VIM
7	WNT3	DPPA4	KRT8	MESP2	GLIPR2	ACTA1
8	PCDH10	PLAAT3	BAMBI	LZTS1	TMEM64	FLNC
9	TBXT	AASS	TMEM54	CDH2	PCAT14	ANKRD1
10	IER3	AL353747.4	HAND1	LHX1	MPC2	ACTC1
11	SP5	UGP2	WNT6	FOXC1	LINC01198	CALD1
12	GNB4	RMST	RARRES2	GSC	LINC00467	POSTN
13	PDHB	MIR302CHG	TRIML2	RSPO3	CA2	TAC1
14	HEBP2	PEBP1	GATA3	BMP2	PLPP1	DIO2
15	IFITM1	TCF7L1	SEMA3D	CNKSR3	FAM184A	FOXD1
16	NODAL	AC006329.1	AHNAK	APLNR	NTF3	IGFBP5
17	CDA	SNRPN	EZR	EOMES	AL353807.5	MIR4435-2HG
18	CCND2	SEPHS1	RHOBTB3	ARL4D	PRTG	CCN2
19	KCNG1	VSNL1	EFNA1	SNAI1	DBI	CCN1
