# Supplementary material for: Efficient differentiation of human primordial germ cells through geometric control reveals a key role for Nodal signaling
Source: eLife. 2022 Apr 8;11:e72811. doi: 10.7554/eLife.72811 (PMC9106331; doi:10.7554/eLife.72811)
Supplement: Supplementary file 3. [file elife-72811-supp3.xlsx]

## Sheet: Sheet1
	iMeLC	pluri	AMLC	PS	PGC	ExMe
0	MIXL1	SOX2	ISL1	GATA6	SOX17	VIM
1	EOMES	ESRG	HAND1	MESP1	PRDM1	POSTN
2	WNT3	DPPA4	WNT6	CER1	NANOS3	COL1A1
3	TBXT	PEBP1	GATA3	FGF17	TFAP2C	SOX3
4	NODAL	TDGF1	BMP4	DKK1	TFAP2A	NES
5	FGF4	LEFTY1	DLX5	MIXL1	WNT5B	DUSP8
6	FGF8	NANOG	KRT18	CDH2	TBX3	PODXL
7	CDH2	PODXL	TFAP2A	LHX1	CXCR4	NOG
8	IL17RD	SPRY1	TBX3	GSC	GATA3	FZD2
9	DUSP5	FZD5	EPCAM	RSPO3	VIM	NKX2-5
10	TDGF1	LEFTY2	KRT7	BMP2	DKK3	SULF2
11	WNT8A	FGFR2	WNT5B	EOMES	CDX2	KRT18
12	GSC	FGFR1	HOXB2	SNAI1	ACVR1	GPC4
13	DUSP26	GPC4	DUSP2	PDGFRA	HS3ST5	TFAP2C
14	PEBP1	POU5F1	NOG	TBXT	SMAD9	HSPG2
15	COL6A2	PAICS	HOXB6	EPHA4	KRT18	CDH2
16	GPC6	FGF2	HEY1	OTX2	ISL1	GATA3
17	FGF17	DUSP14	TFAP2C	WNT5A	SPRY4	SDC3
18	NDST3	NODAL	LYPD1	FGF4	MESP1	SDC2
19	PAICS	ZIC3	SMAD9	DKK4	SDC2	DKK3
