# Supplementary figures and images for: Efficient differentiation of human primordial germ cells through geometric control reveals a key role for Nodal signaling
Source: eLife journal article supplement (doi:10.7554/elife.72811), 2022-04-08

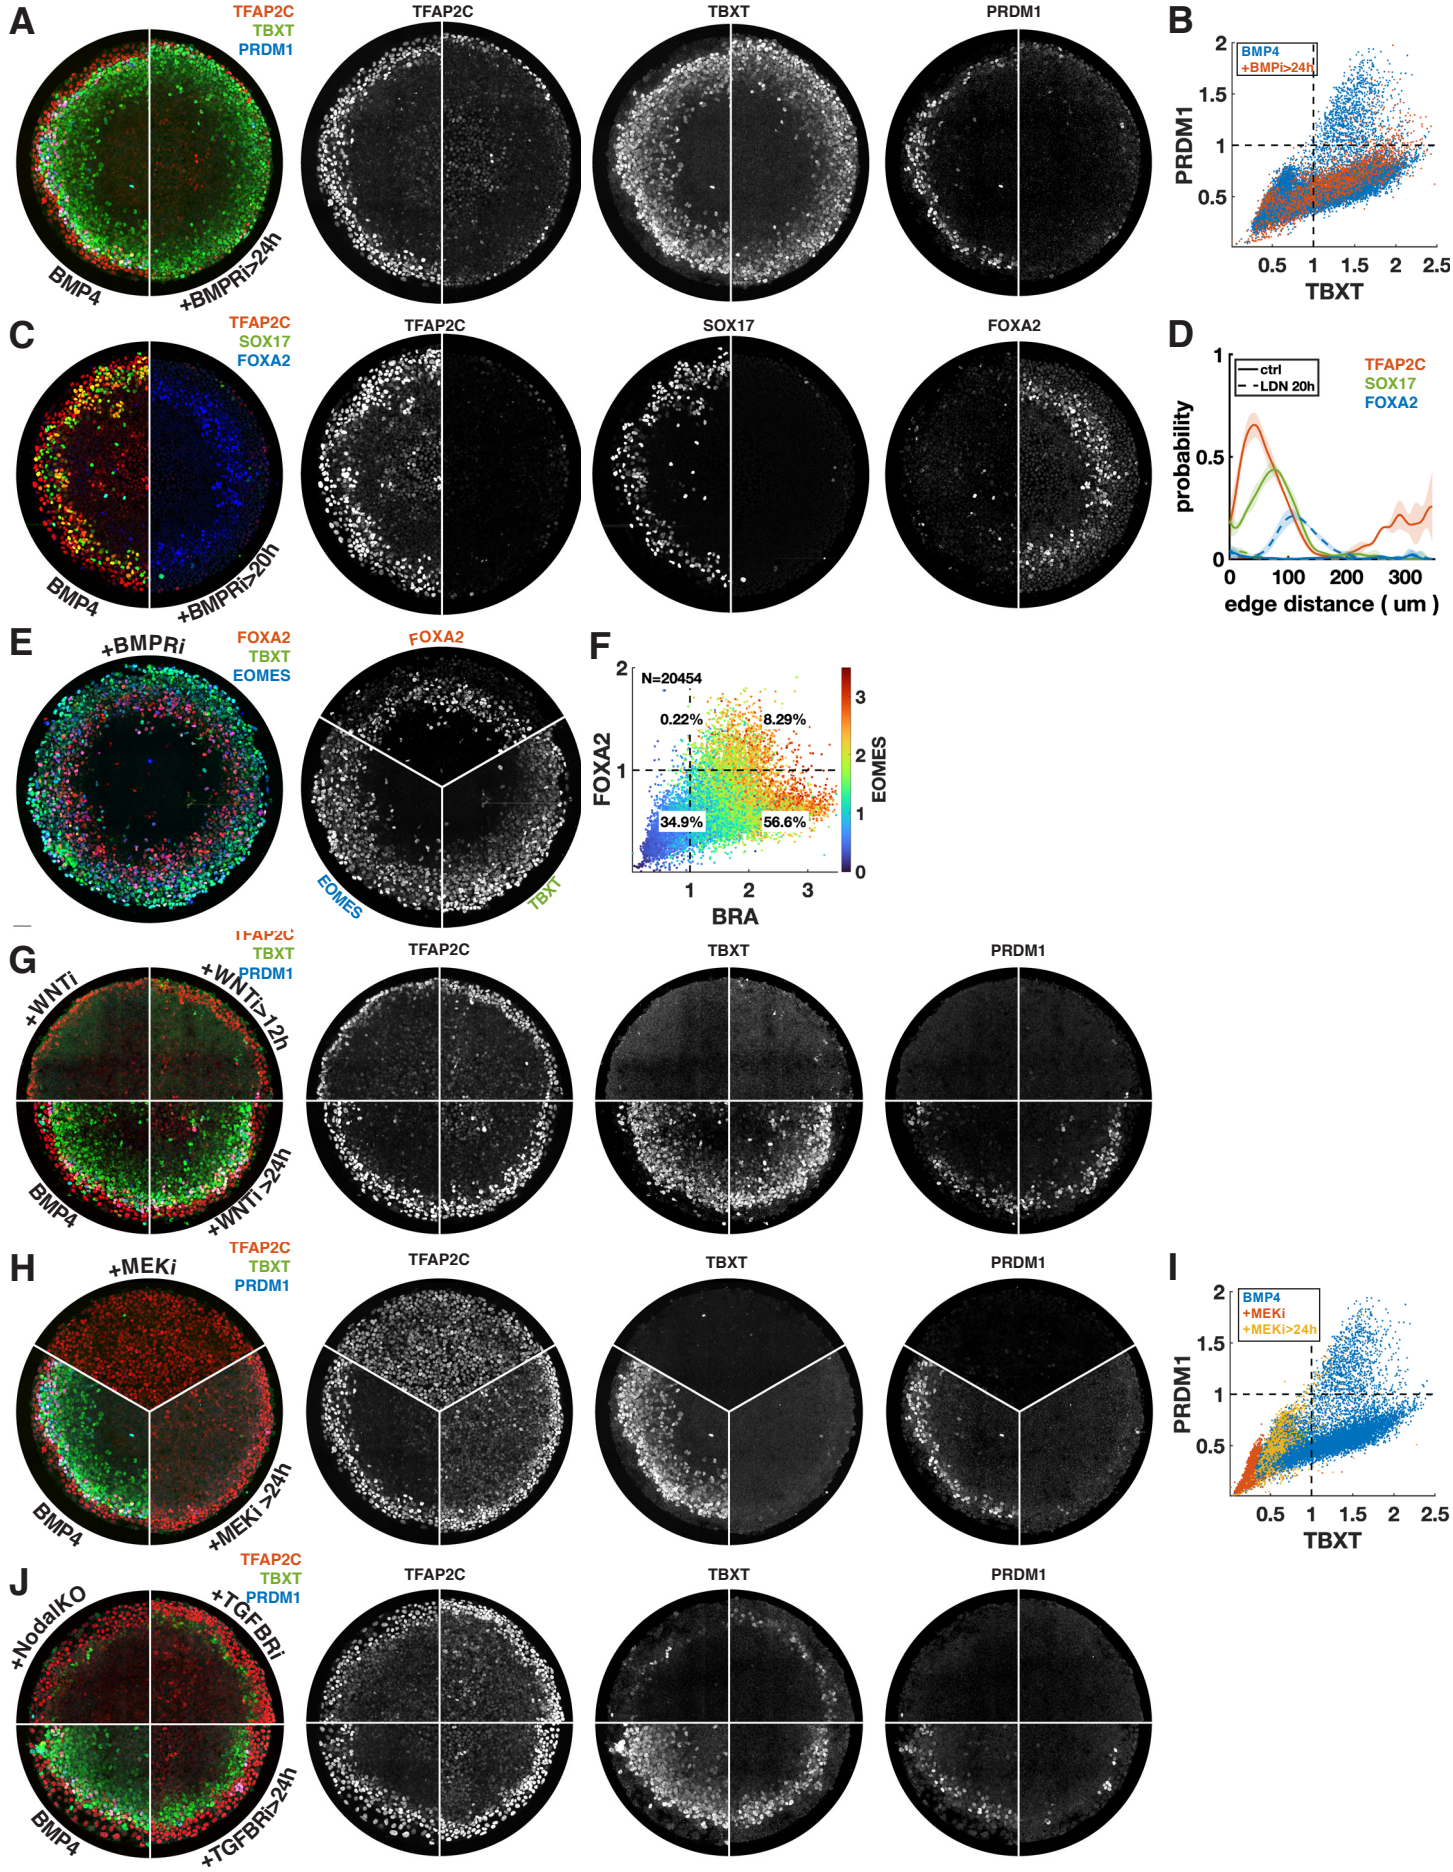

Supplement: supp [file elife-72811-supp-v1.zip]

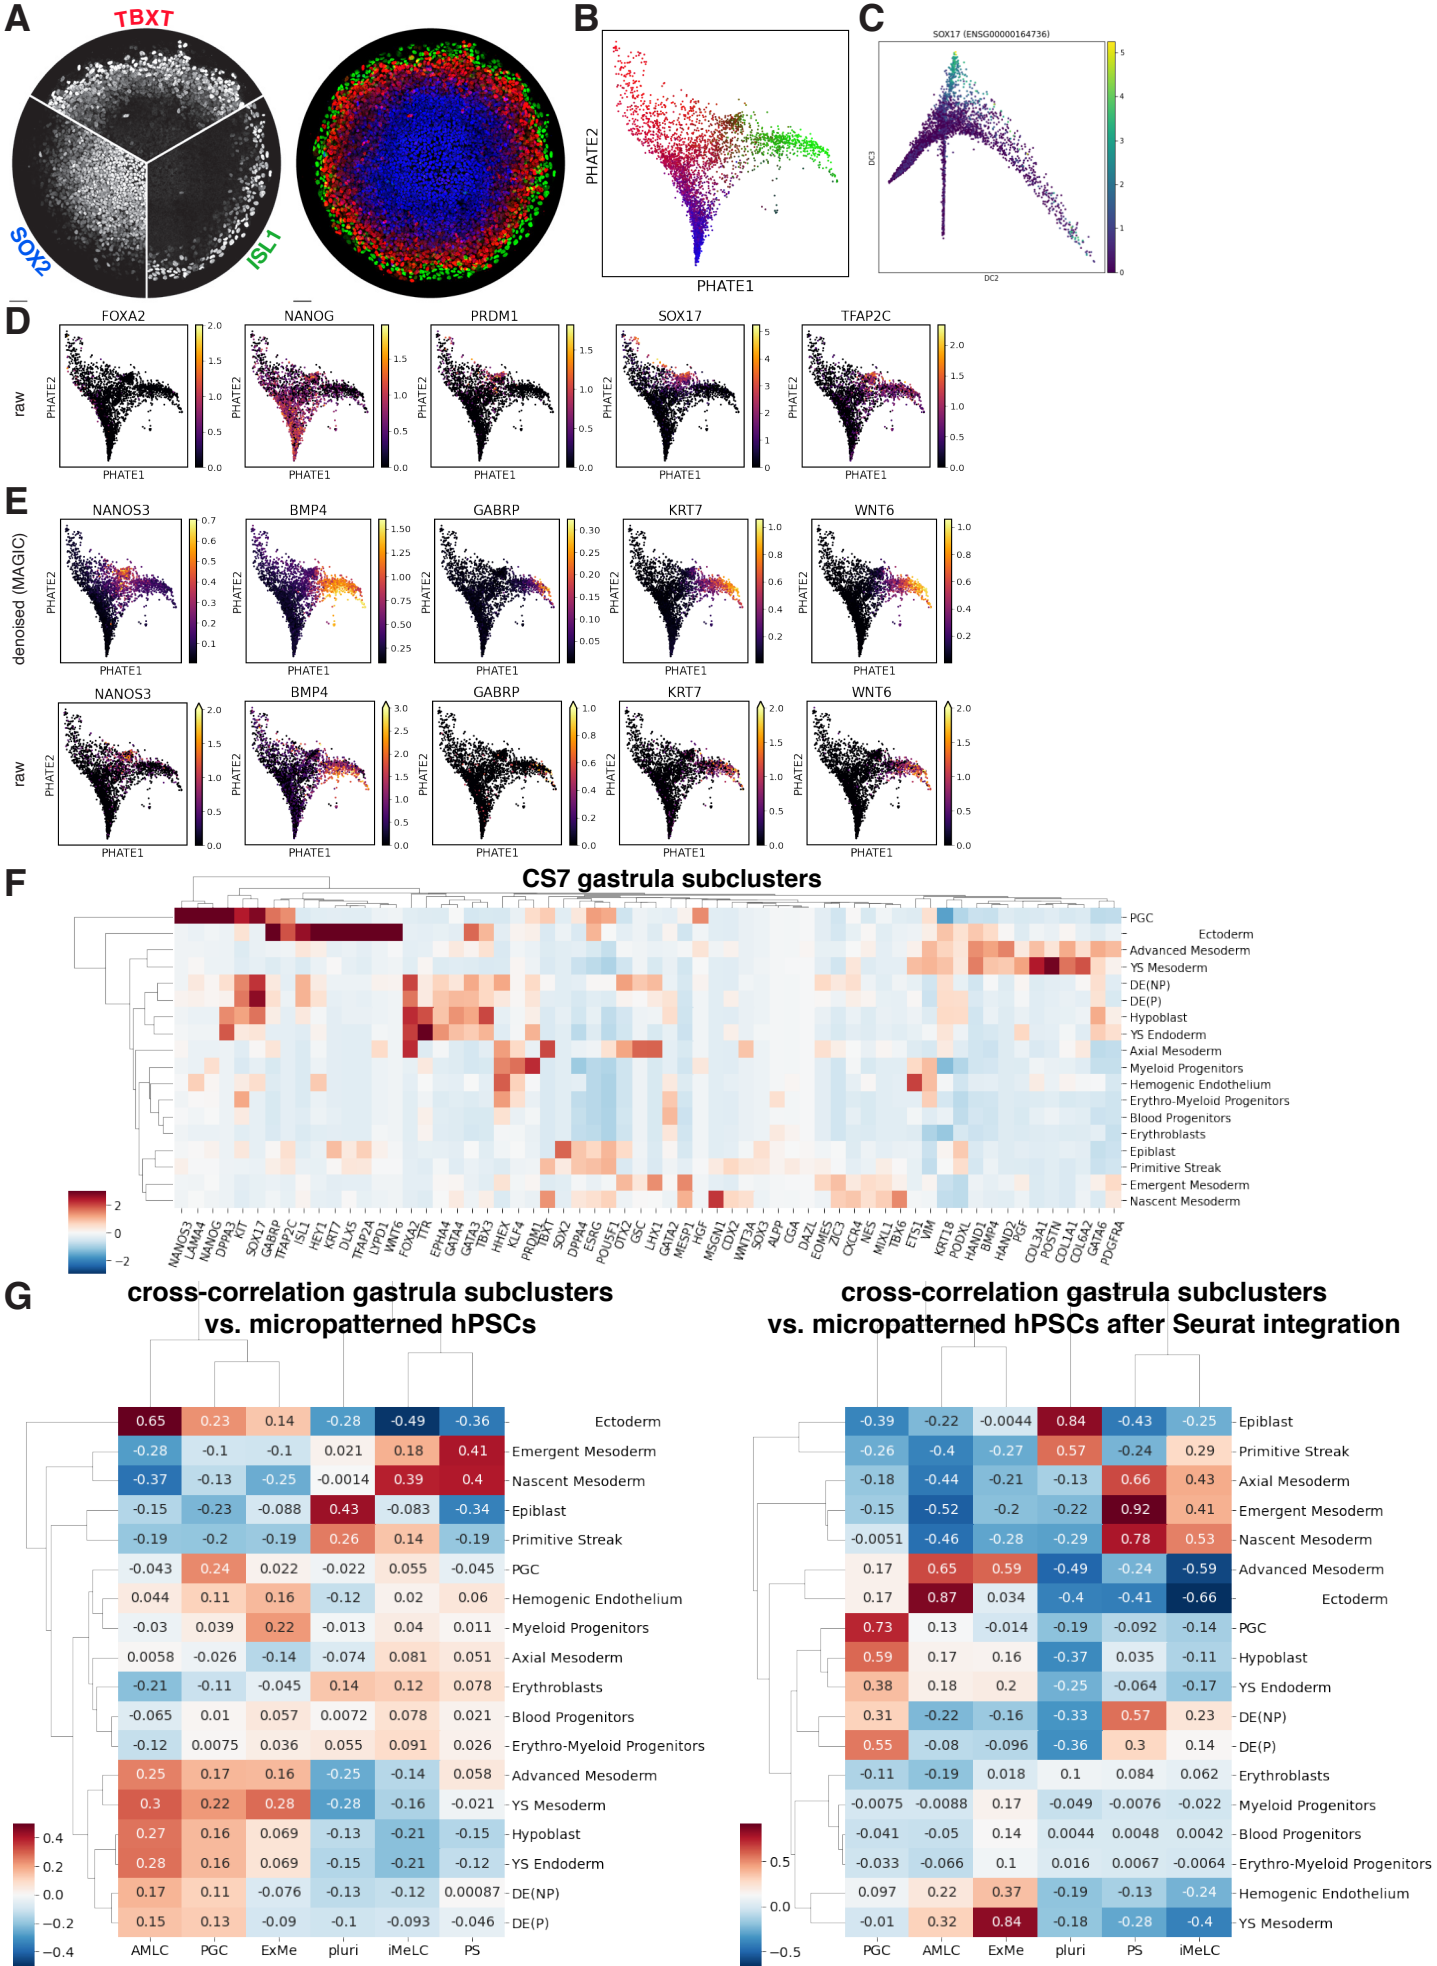

Supplement: supp [file elife-72811-supp-v1.zip]

**A**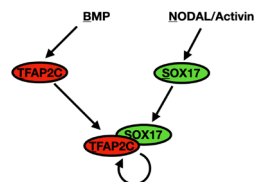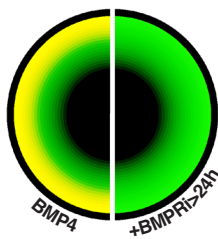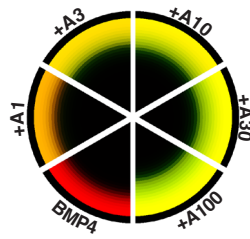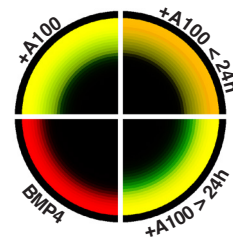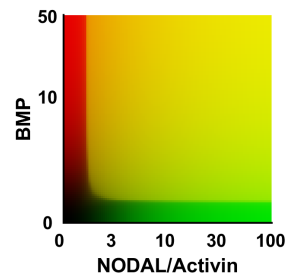**B**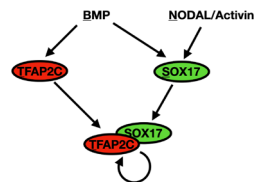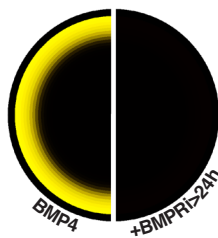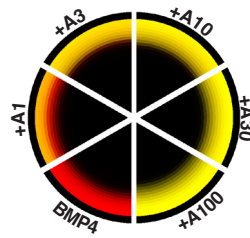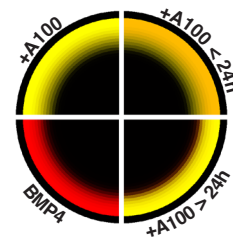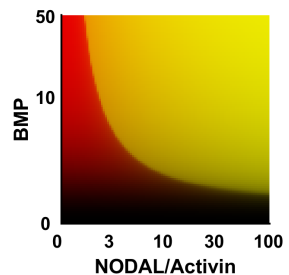**C**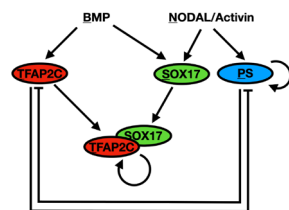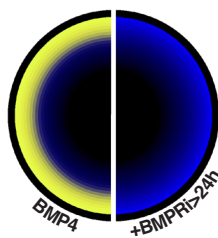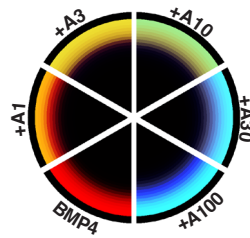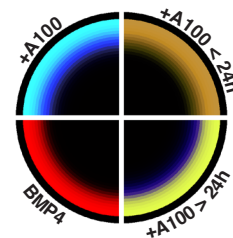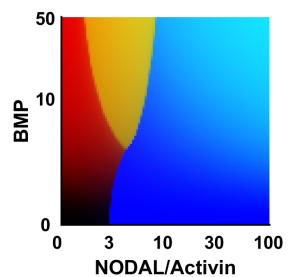**D**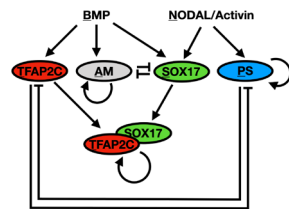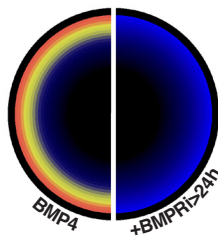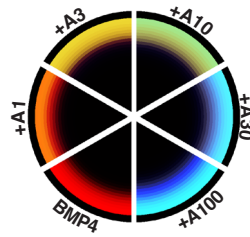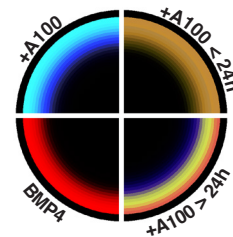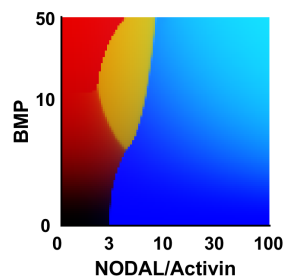

Supplement: supp [file elife-72811-supp-v1.zip]

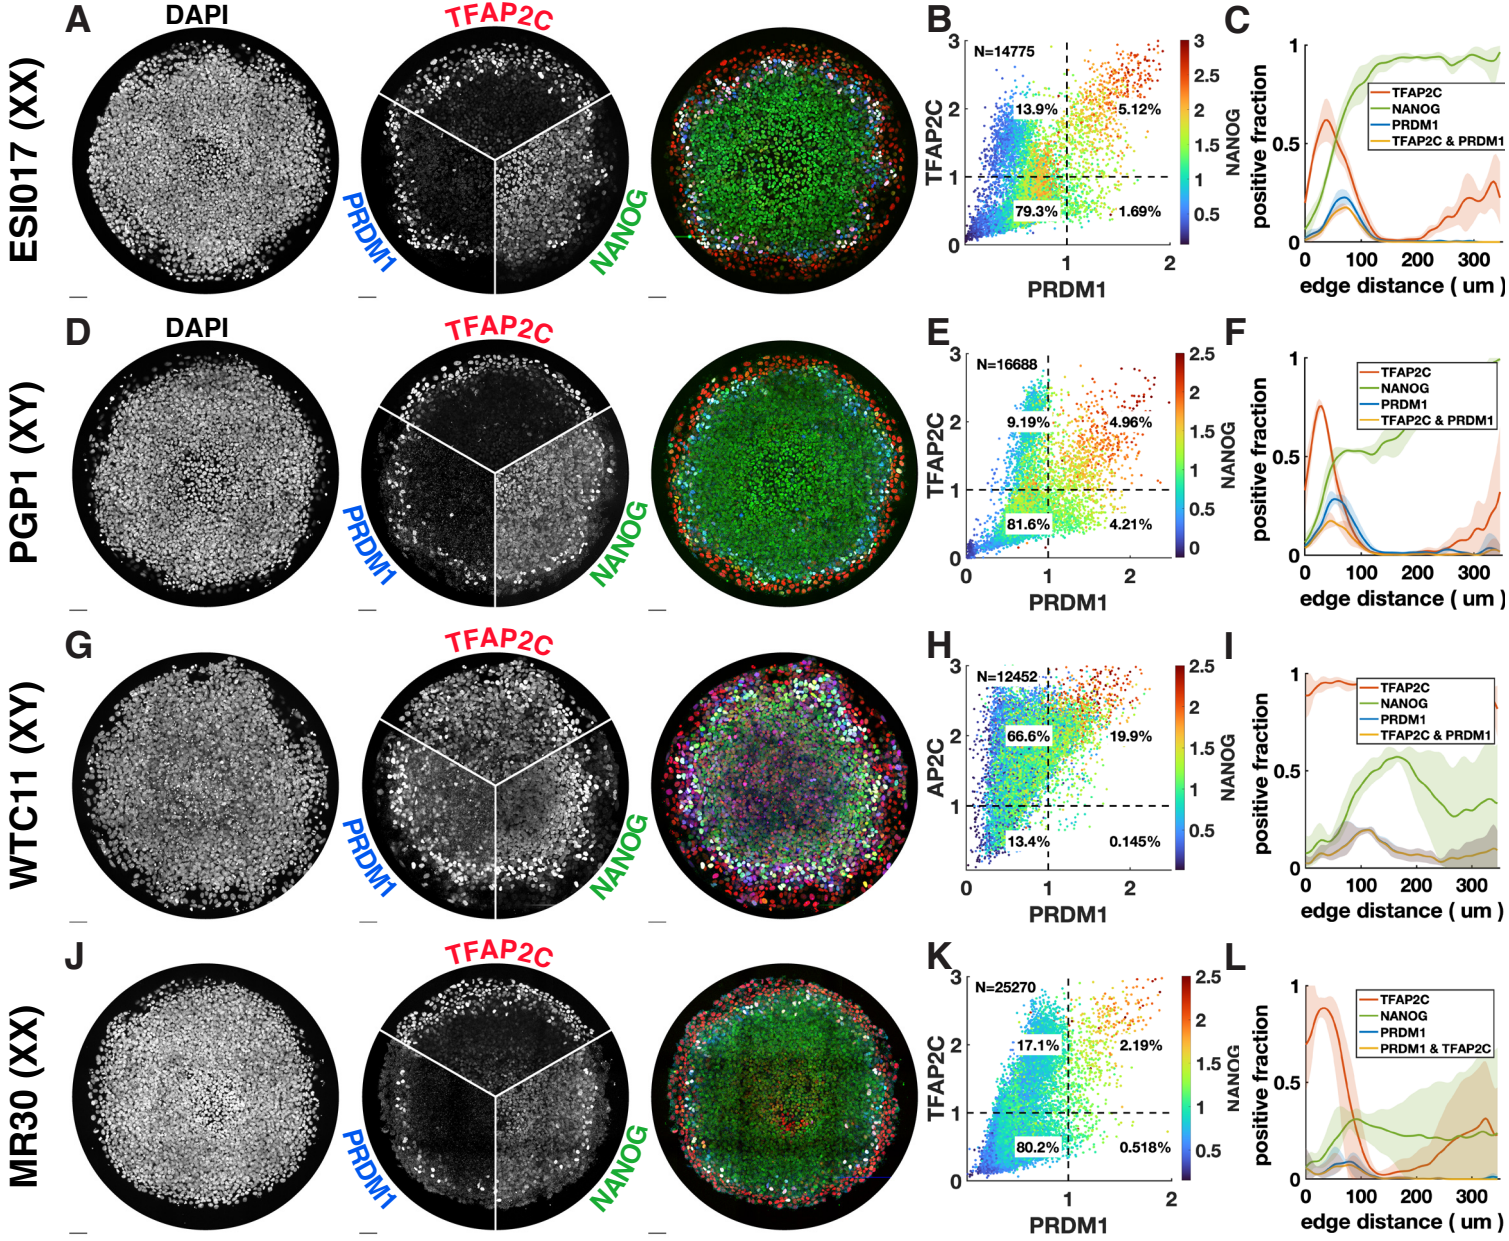

Supplement: supp [file elife-72811-supp-v1.zip]

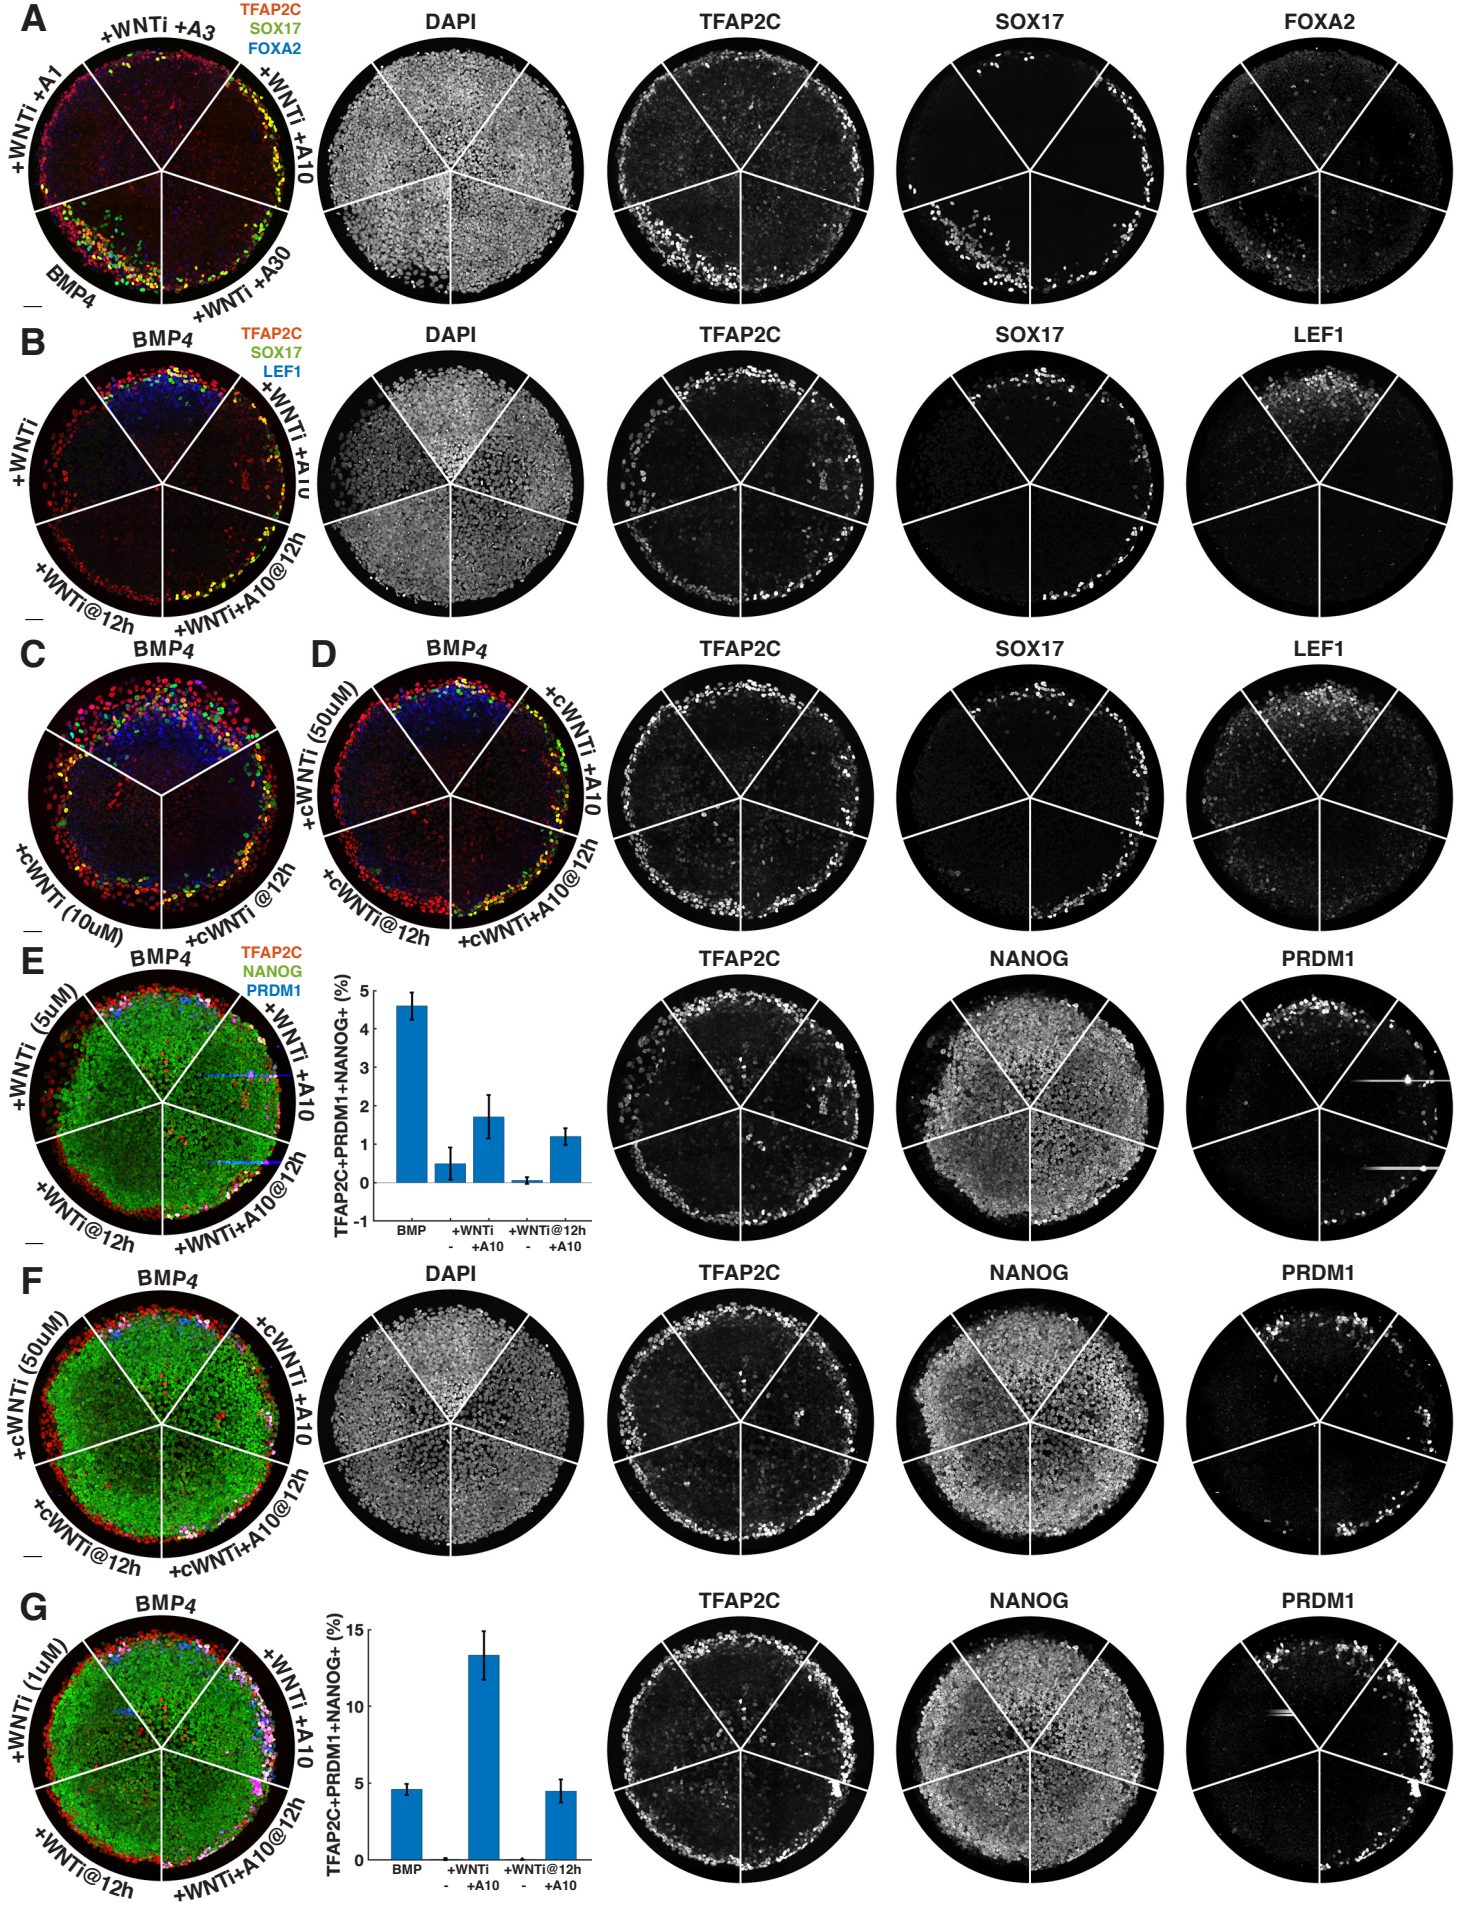

Supplement: supp [file elife-72811-supp-v1.zip]

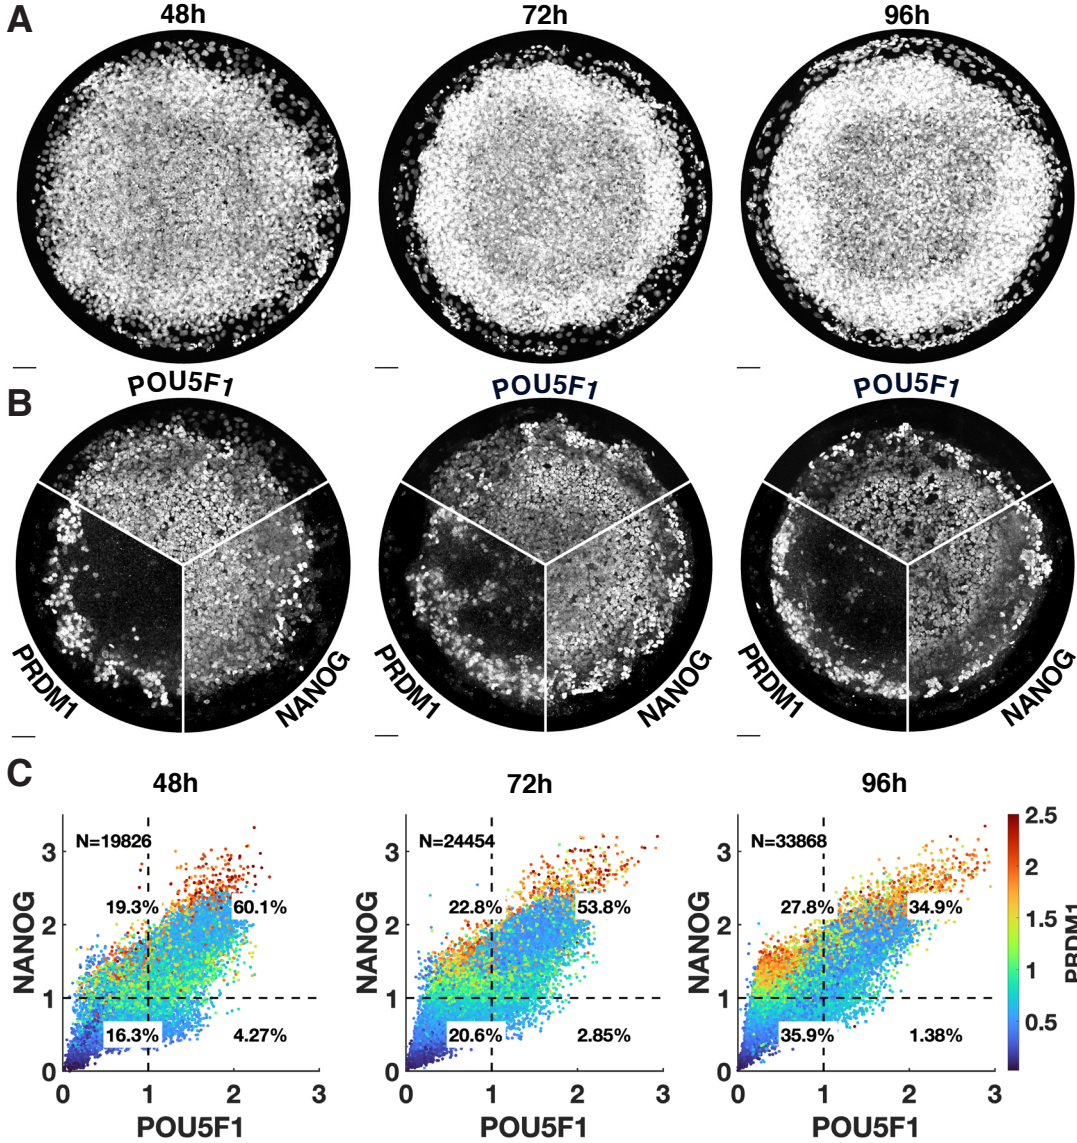

Supplement: supp [file elife-72811-supp-v1.zip]

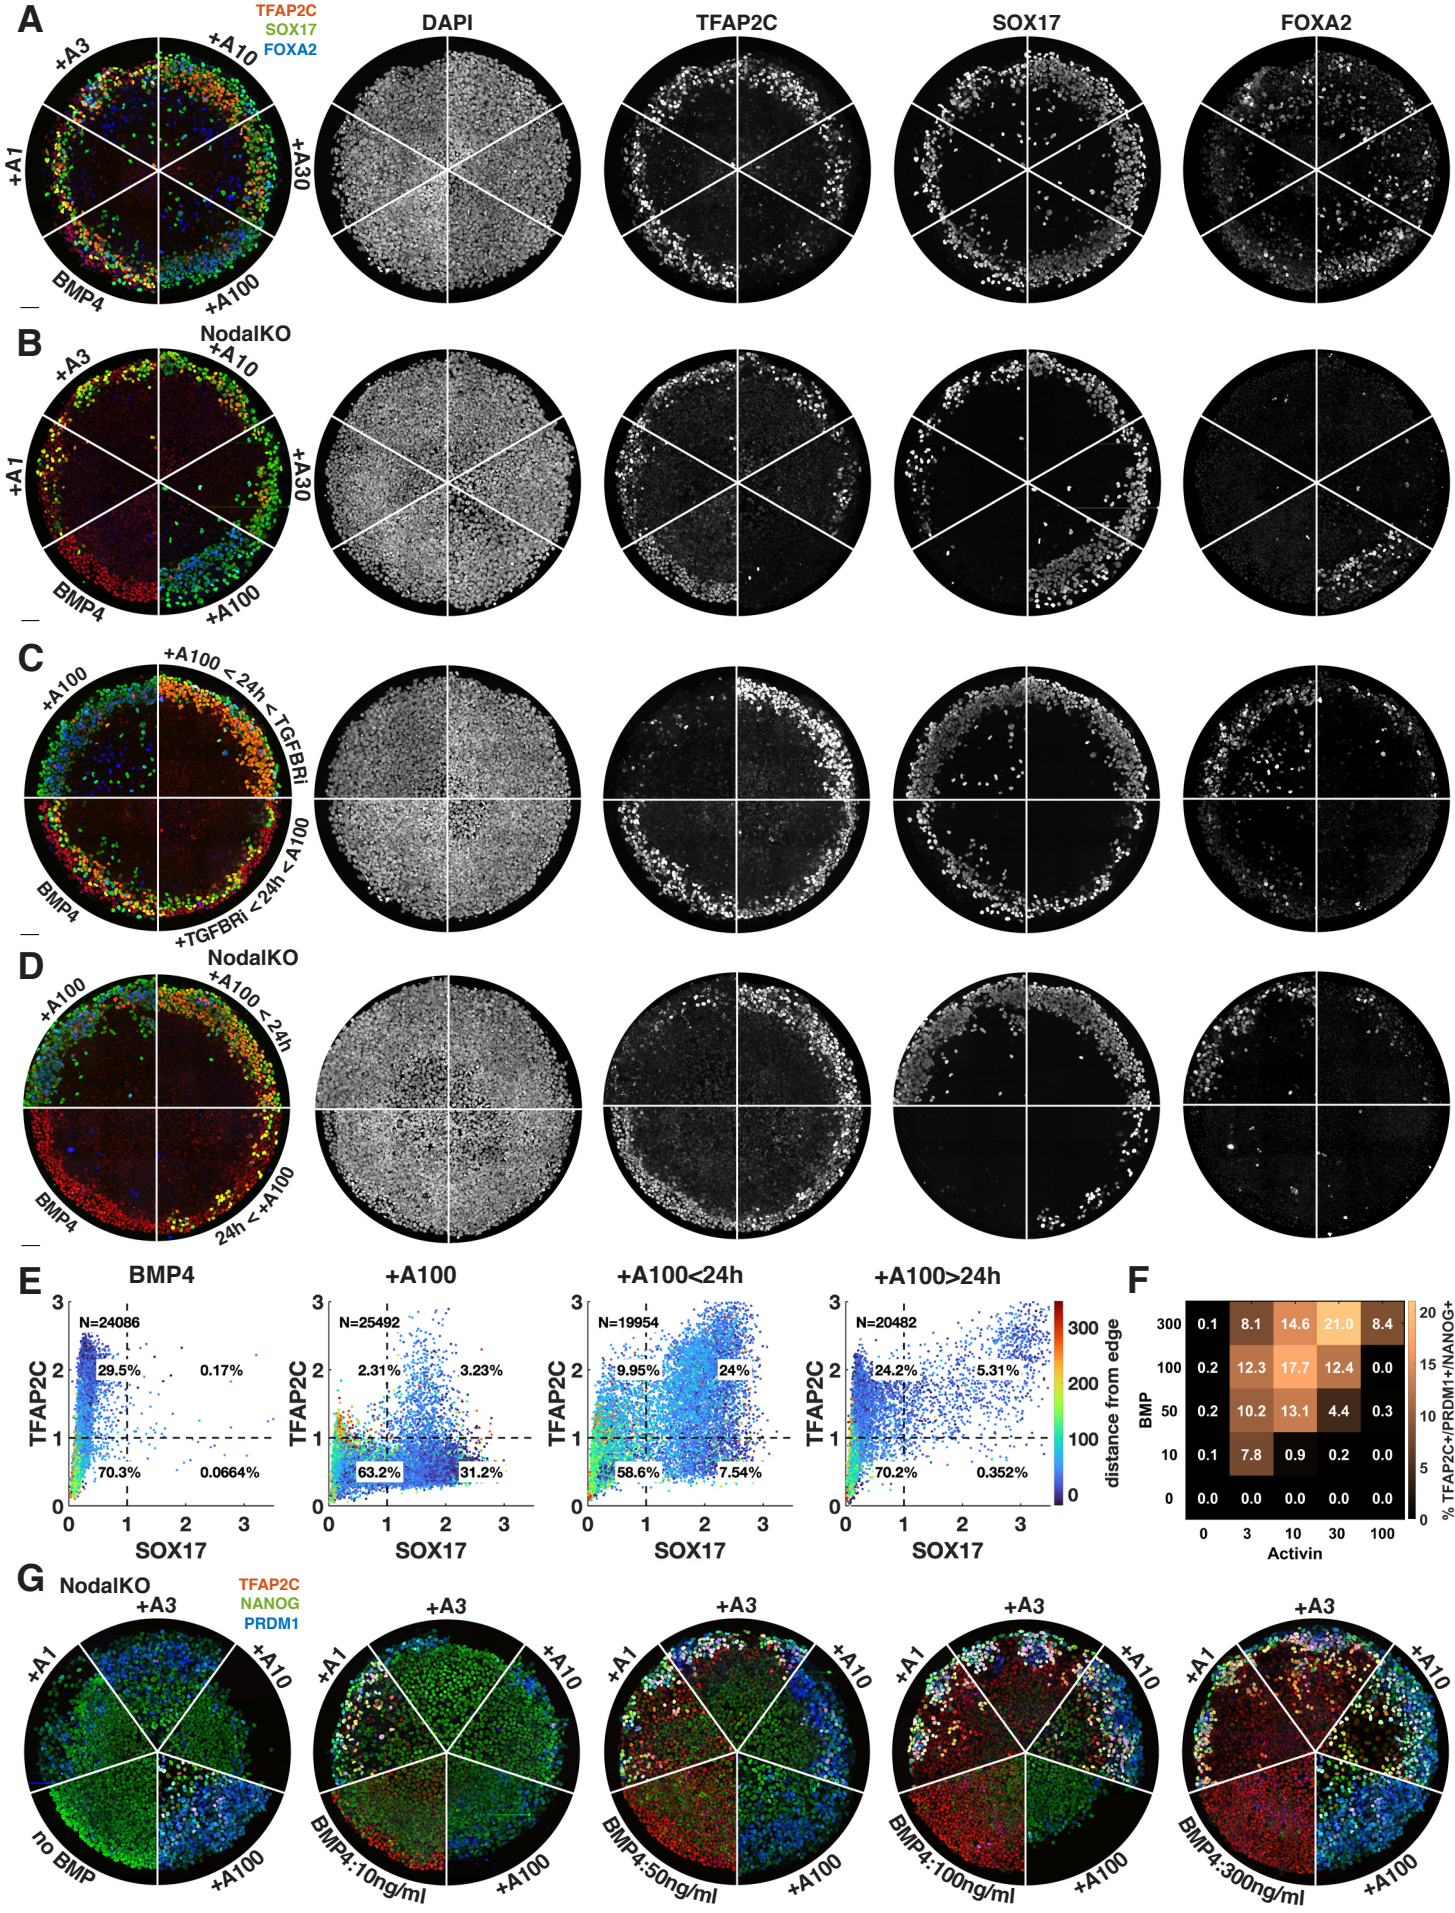

Supplement: supp [file elife-72811-supp-v1.zip]

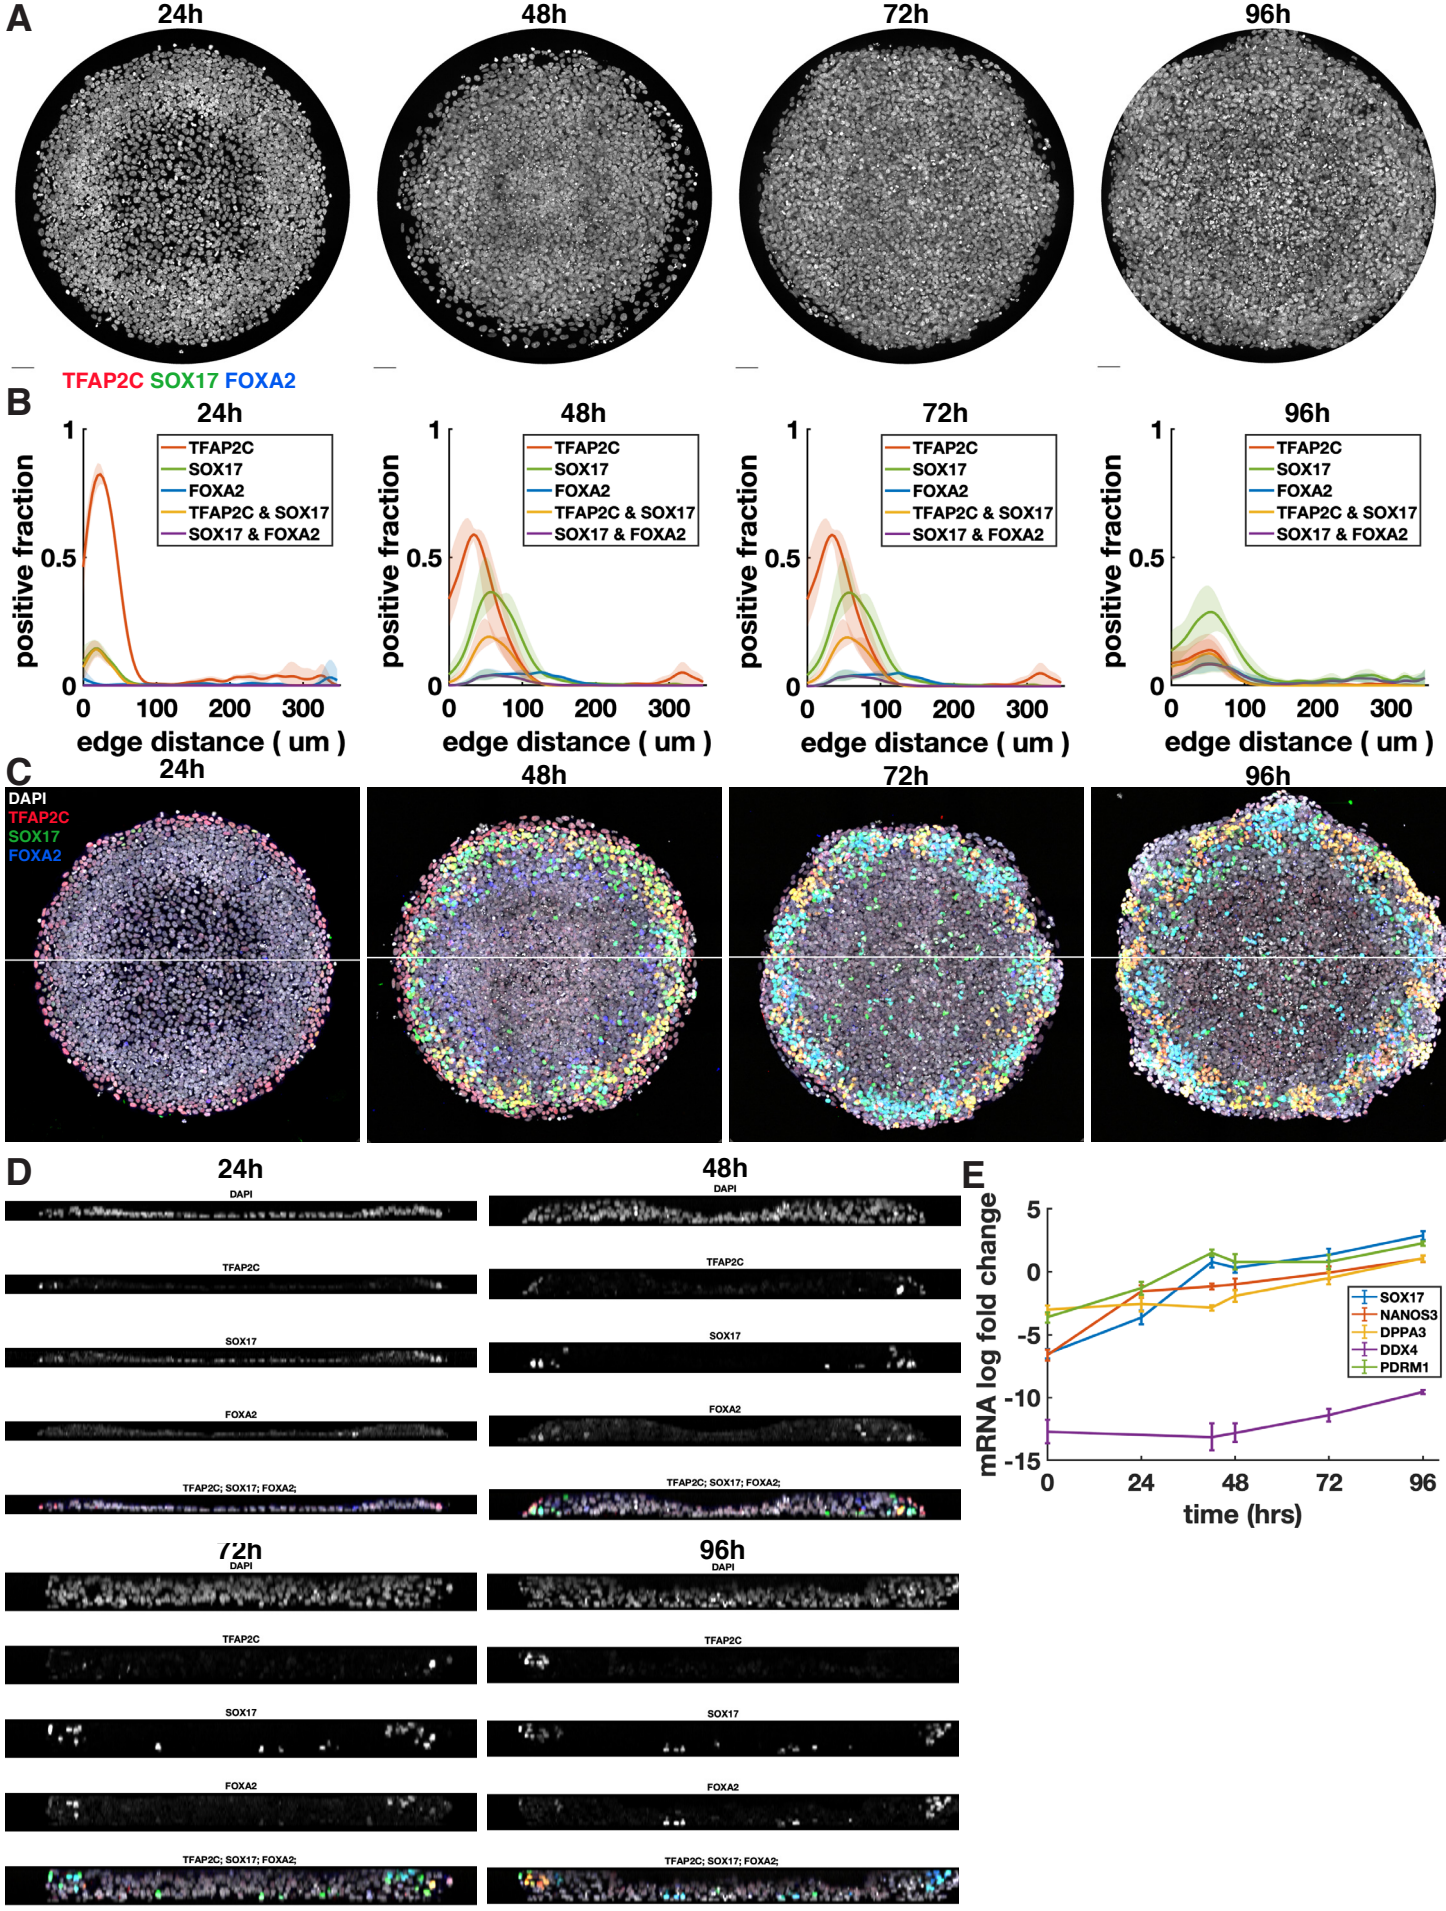

Supplement: supp [file elife-72811-supp-v1.zip]

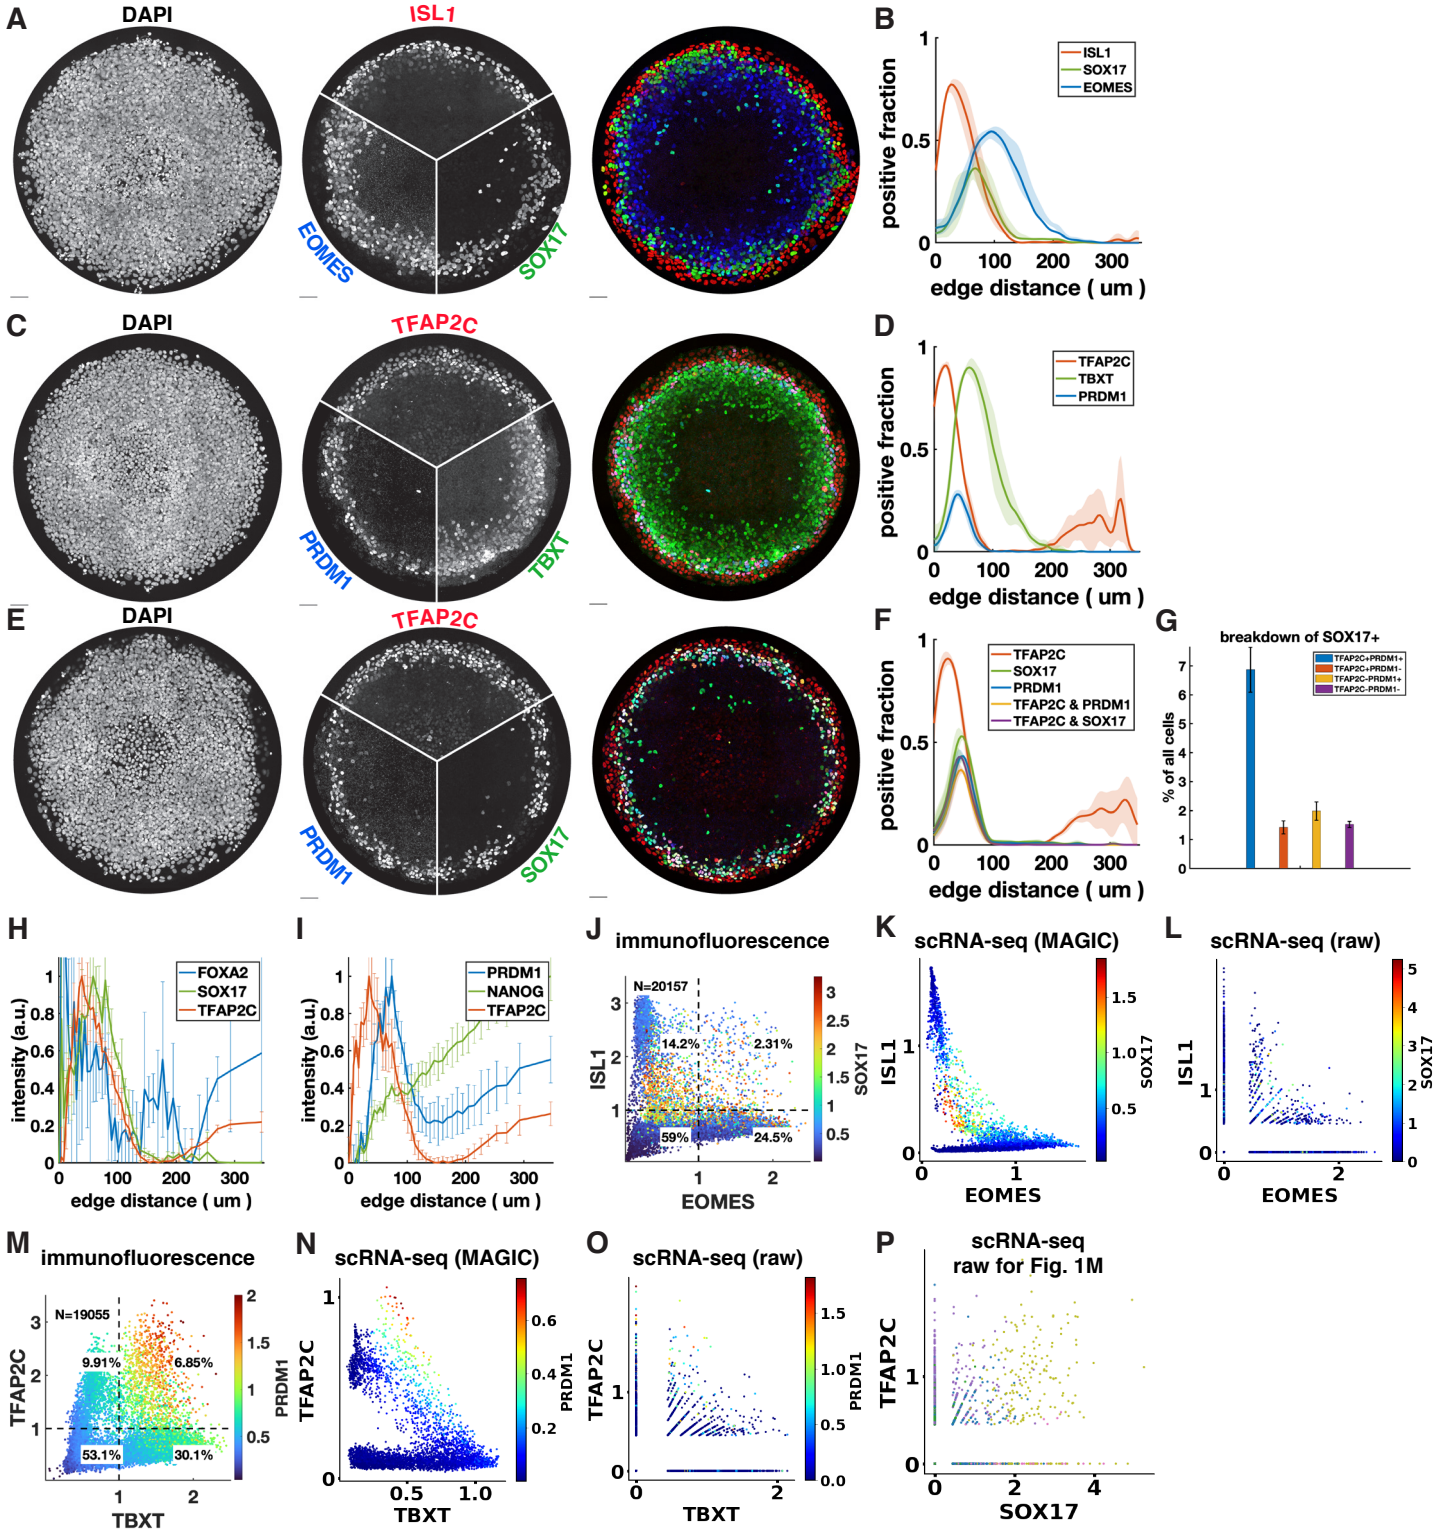

Supplement: supp [file elife-72811-supp-v1.zip]

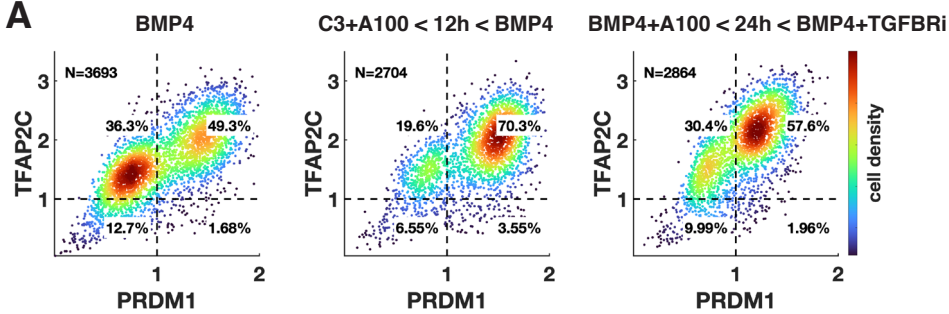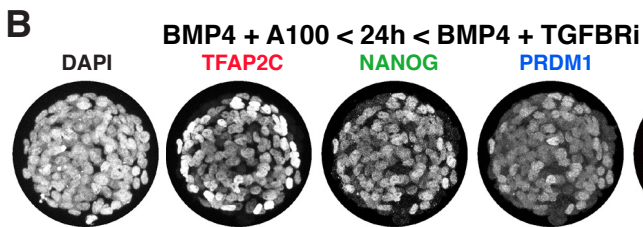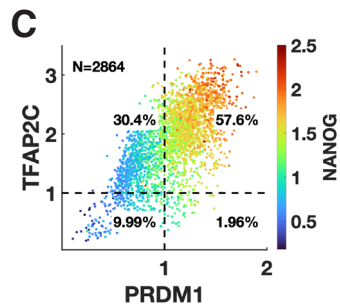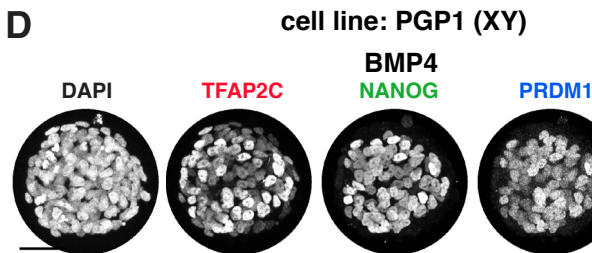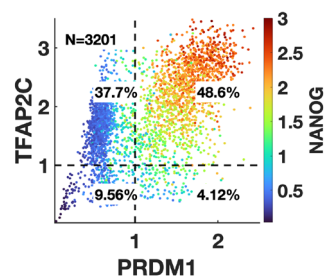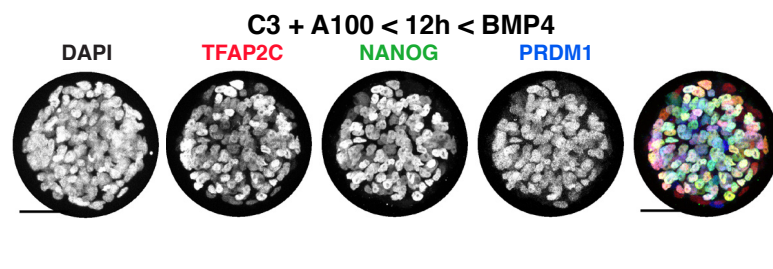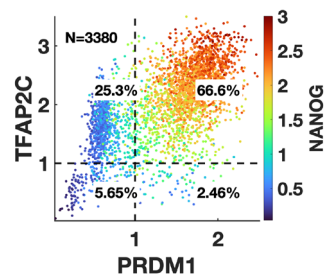

Supplement: supp [file elife-72811-supp-v1.zip]
